# Supplementary material for: Peak oxygen uptake in Paralympic sitting sports: A systematic literature review, meta- and pooled-data analysis
Source: PubMed Central journal article supplement (PMC5825058; doi:10.1371/journal.pone.0192903), 2018-02-23
Supplement: pone.0192903.s003.pdf [file pone.0192903.s003.pdf]

**S2 Table. Quality scores of the 57 included studies**

Scoring of quality items for each of the studies included in this systematic literature review on peak aerobic capacity between and within Paralympic sitting sports

|                                      | 1   | 2   | 3   | 5       | 6   | 7   | 11  | 12  | 20  | 21  | 22  | 25  | Points scored | Number of applicable items | Percentage of points scored | Methodological quality |
|--------------------------------------|-----|-----|-----|---------|-----|-----|-----|-----|-----|-----|-----|-----|---------------|----------------------------|-----------------------------|------------------------|
| Barfield et al. (2010) [74]          | no  | yes | yes | yes (2) | yes | yes | u   | no  | u   | yes | u   | no  | 7             | 13                         | 54                          | moderate               |
| Bernardi et al. (2010) [2]           | yes | yes | yes | yes (1) | yes | yes | u   | no  | u   | yes | yes | yes | 9             | 13                         | 69                          | good                   |
| Bernardi et al. (2012) [6]           | yes | yes | no  | no      | yes | yes | u   | no  | u   | yes | u   | no  | 5             | 13                         | 38                          | low                    |
| Bhambhani et al. (1995) [58]         | yes | yes | yes | yes (1) | yes | yes | u   | no  | u   | yes | u   | no  | 7             | 13                         | 54                          | moderate               |
| Bhambhani et al. (2012) [28]         | no  | yes | yes | yes (1) | yes | yes | u   | no  | yes | yes | u   | no  | 7             | 13                         | 54                          | moderate               |
| Bloxham et al. (2001) [34]           | yes | yes | no  | no      | yes | no  | u   | no  | u   | yes | u   | yes | 5             | 13                         | 38                          | low                    |
| Campbell et al. (2004) [25]          | no  | yes | yes | yes (1) | yes | yes | u   | no  | yes | yes | u   | no  | 7             | 13                         | 54                          | moderate               |
| Castle et al. (2013) [73]            | yes | yes | yes | yes (1) | yes | yes | u   | no  | u   | yes | u   | no  | 7             | 13                         | 54                          | moderate               |
| Cooper et al. (1992) [59]            | no  | yes | yes | yes (2) | yes | yes | u   | no  | u   | yes | yes | no  | 8             | 13                         | 62                          | moderate               |
| Cooper et al. (1999) [60]            | yes | yes | yes | no      | yes | yes | u   | no  | u   | yes | u   | yes | 7             | 13                         | 54                          | moderate               |
| Coutts & Stogryn (1987) [61]         | no  | yes | yes | yes (1) | yes | no  | u   | no  | u   | yes | yes | no  | 6             | 13                         | 46                          | moderate               |
| Coutts et al. (1990) [35]            | no  | yes | yes | no      | yes | yes | u   | no  | u   | yes | yes | no  | 6             | 13                         | 46                          | moderate               |
| Crews et al. (1982) [62]             | no  | yes | yes | yes (2) | yes | no  | u   | no  | u   | yes | u   | no  | 6             | 13                         | 46                          | moderate               |
| Croft et al. (2010) [36]             | no  | yes | yes | yes (2) | yes | yes | u   | yes | u   | yes | u   | yes | 9             | 13                         | 69                          | good                   |
| de Lira et al. (2010) [37]           | yes | yes | yes | yes (1) | yes | yes | u   | no  | u   | yes | u   | no  | 7             | 13                         | 54                          | moderate               |
| Diaper & Goosey-Tolfrey (2009) [53]  | no  | yes | yes | yes (1) | yes | N/A | N/A | N/A | u   | N/A | N/A | yes | 5             | 8                          | 63                          | -                      |
| Domaszewska et al. (2013) [75]       | no  | yes | yes | yes (1) | yes | yes | u   | no  | u   | yes | u   | no  | 6             | 13                         | 46                          | moderate               |
| Dwyer & Davis (1998) [38]            | no  | yes | no  | no      | yes | yes | u   | no  | u   | yes | u   | no  | 4             | 13                         | 31                          | low                    |
| Fischer et al. (2014) [30]           | yes | yes | yes | yes (2) | yes | yes | u   | no  | u   | yes | u   | no  | 8             | 13                         | 62                          | moderate               |
| Gass & Camp (1979) [33]              | yes | yes | yes | yes (2) | yes | yes | u   | no  | u   | yes | yes | no  | 9             | 13                         | 69                          | good                   |
| Gass et al. (2002) [63]              | yes | yes | yes | yes (1) | yes | yes | u   | no  | u   | yes | u   | no  | 7             | 13                         | 54                          | moderate               |
| Goll et al. (2015) [52]              | no  | yes | no  | no      | yes | yes | u   | no  | u   | yes | u   | yes | 5             | 13                         | 38                          | low                    |
| Goosey & Campbell (1998) [64]        | no  | yes | yes | yes (1) | yes | yes | u   | no  | yes | yes | u   | no  | 7             | 13                         | 54                          | moderate               |
| Goosey et al. (2000) [65]            | yes | yes | yes | yes (1) | yes | yes | u   | no  | u   | yes | u   | no  | 7             | 13                         | 54                          | moderate               |
| Goosey-Tolfrey & Tolfrey (2004) [39] | no  | yes | yes | yes (1) | yes | yes | u   | no  | u   | yes | u   | yes | 7             | 13                         | 54                          | moderate               |

|                                       |     |     |     |         |     |     |     |     |     |     |     |     |   |    |    |          |
|---------------------------------------|-----|-----|-----|---------|-----|-----|-----|-----|-----|-----|-----|-----|---|----|----|----------|
| Goosey-Tolfrey et al. (2005) [40]     | no  | yes | yes | yes (2) | yes | yes | u   | no  | u   | yes | yes | yes | 9 | 13 | 69 | good     |
| Goosey-Tolfrey et al. (2006) [54]     | no  | yes | yes | yes (1) | yes | yes | u   | no  | u   | yes | u   | no  | 6 | 13 | 46 | moderate |
| Goosey-Tolfrey et al. (2008) [55]     | yes | yes | yes | yes (1) | yes | yes | u   | no  | u   | yes | u   | no  | 7 | 13 | 54 | moderate |
| Goosey-Tolfrey & Tolfrey (2008) [41]  | no  | yes | yes | yes (1) | yes | yes | u   | no  | u   | yes | u   | yes | 7 | 13 | 54 | moderate |
| Goosey-Tolfrey et al. (2014) [42]     | no  | yes | yes | yes (2) | yes | yes | u   | no  | yes | yes | u   | yes | 9 | 13 | 69 | good     |
| Griggs et al. (2015) [43]             | no  | yes | yes | yes (2) | yes | yes | u   | no  | u   | yes | u   | no  | 7 | 13 | 54 | moderate |
| Hooker & Wells (1992) [66]            | no  | yes | yes | yes (2) | yes | yes | u   | no  | u   | yes | u   | no  | 7 | 13 | 54 | moderate |
| Knechtle & Kopfli (2001) [44]         | no  | yes | yes | yes (1) | yes | yes | u   | no  | u   | yes | u   | no  | 6 | 13 | 46 | moderate |
| Knechtle et al. (2004b) [31]          | no  | yes | yes | yes (1) | yes | yes | u   | no  | u   | yes | u   | no  | 6 | 13 | 46 | moderate |
| Knechtle et al. (2004a) [67]          | no  | yes | yes | yes (1) | yes | yes | u   | no  | u   | yes | u   | no  | 6 | 13 | 46 | moderate |
| Leicht et al. (2012) [45]             | yes | yes | yes | yes (2) | yes | yes | u   | no  | u   | yes | u   | yes | 9 | 13 | 69 | good     |
| Leicht et al. (2014) [46]             | yes | yes | yes | yes (2) | yes | yes | u   | no  | u   | yes | u   | no  | 8 | 13 | 62 | moderate |
| Lovell et al. (2012) [32]             | no  | yes | yes | yes (2) | yes | yes | u   | no  | u   | yes | u   | no  | 7 | 13 | 54 | moderate |
| Morgulec-Adamowicz et al. (2011) [76] | yes | yes | yes | yes (2) | yes | yes | u   | no  | u   | yes | u   | no  | 8 | 13 | 62 | moderate |
| Morris (1986) [68]                    | no  | yes | yes | yes (2) | yes | N/A | N/A | N/A | u   | N/A | N/A | no  | 5 | 8  | 63 | -        |
| O'Connor et al. (1998) [69]           | yes | yes | yes | yes (1) | yes | yes | u   | no  | u   | yes | u   | no  | 7 | 13 | 54 | moderate |
| Perret et al. (2012) [70]             | yes | yes | yes | yes (1) | yes | yes | u   | no  | u   | yes | u   | no  | 7 | 13 | 54 | moderate |
| Rotstein et al. (1994) [47]           | no  | yes | yes | yes (1) | yes | yes | u   | no  | u   | yes | u   | no  | 6 | 13 | 46 | moderate |
| Roy et al. (2006) [56]                | no  | yes | yes | yes (2) | yes | yes | u   | no  | u   | yes | u   | yes | 8 | 13 | 62 | moderate |
| Sandbakk et al. (2014) [81]           | yes | yes | no  | yes (1) | yes | yes | u   | no  | u   | yes | u   | yes | 7 | 13 | 54 | moderate |
| Schmid et al. (1998) [48]             | no  | yes | yes | yes (2) | yes | yes | u   | no  | u   | yes | u   | no  | 7 | 13 | 54 | moderate |
| Shiba et al. (2010) [71]              | no  | yes | yes | yes (1) | yes | yes | u   | no  | u   | yes | u   | yes | 7 | 13 | 54 | moderate |
| Taylor et al. (2010) [77]             | no  | yes | yes | yes (2) | yes | yes | u   | no  | u   | yes | u   | no  | 7 | 13 | 54 | moderate |
| Tolfrey et al. (2001)[72]             | no  | yes | yes | yes (1) | yes | yes | u   | no  | u   | yes | u   | yes | 7 | 13 | 54 | moderate |
| van der Woude et al. (2002) [26]      | no  | yes | yes | yes (2) | yes | yes | u   | no  | u   | yes | u   | no  | 7 | 13 | 54 | moderate |
| Vanlandewijck et al. (1994) [49]      | no  | yes | yes | yes (2) | yes | yes | u   | no  | u   | yes | u   | no  | 7 | 13 | 54 | moderate |
| Veeger et al. (1991) [50]             | no  | yes | yes | yes (1) | yes | yes | u   | no  | u   | yes | yes | no  | 7 | 13 | 54 | moderate |
| Vinet et al. (1996) [57]              | no  | yes | yes | yes (2) | yes | yes | u   | no  | u   | yes | u   | no  | 7 | 13 | 54 | moderate |
| West et al. (2013) [78]               | yes | yes | yes | yes (1) | yes | yes | u   | no  | u   | yes | u   | no  | 7 | 13 | 54 | moderate |
| West et al. (2014) [80]               | yes | yes | yes | yes (2) | yes | yes | u   | no  | u   | yes | u   | no  | 8 | 13 | 62 | moderate |
| West et al. (2014) [79]               | yes | yes | yes | yes (2) | yes | yes | u   | no  | u   | yes | u   | no  | 8 | 13 | 62 | moderate |
| Zacharakis et al. (2012) [51]         | yes | yes | yes | yes (1) | yes | yes | u   | no  | u   | yes | u   | no  | 7 | 13 | 54 | moderate |
